# Supplementary material for: Toll-like receptor 8 agonists improve NK-cell function primarily targeting CD56brightCD16− subset
Source: PubMed Central journal article supplement — J Immunother Cancer. 2022 Jan 26;10(1):e003385. doi: 10.1136/jitc-2021-003385 (PMC8804697; doi:10.1136/jitc-2021-003385), 2022-01-26
Supplement: jitc-2021-003385supp002.pdf [file jitc-2021-003385supp002.pdf]

## Supplementary Figure 2

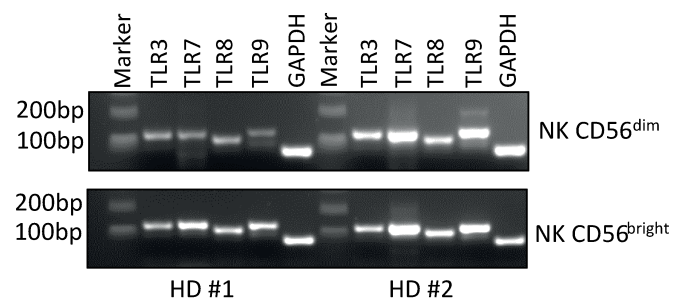**Suppl Fig. 2. Endosomal TLRs mRNA expression.**

RNA was extracted from freshly isolated CD56<sup>bright</sup> CD16<sup>-</sup> and CD56<sup>dim</sup> CD16<sup>+</sup> NK cells subsets; relative cDNA was amplified with TLRs specific primers and resolved by electrophoresis in a 2% agarose gel. GAPDH represents the reaction positive control. HD]#1 and HD#2 refers to two representative healthy donors.
