# Supplementary material for: Toll-like receptor 8 agonists improve NK-cell function primarily targeting CD56brightCD16− subset
Source: PubMed Central journal article supplement — J Immunother Cancer. 2022 Jan 26;10(1):e003385. doi: 10.1136/jitc-2021-003385 (PMC8804697; doi:10.1136/jitc-2021-003385), 2022-01-26
Supplement: jitc-2021-003385supp003.pdf [file jitc-2021-003385supp003.pdf]

## Supplementary Figure 3

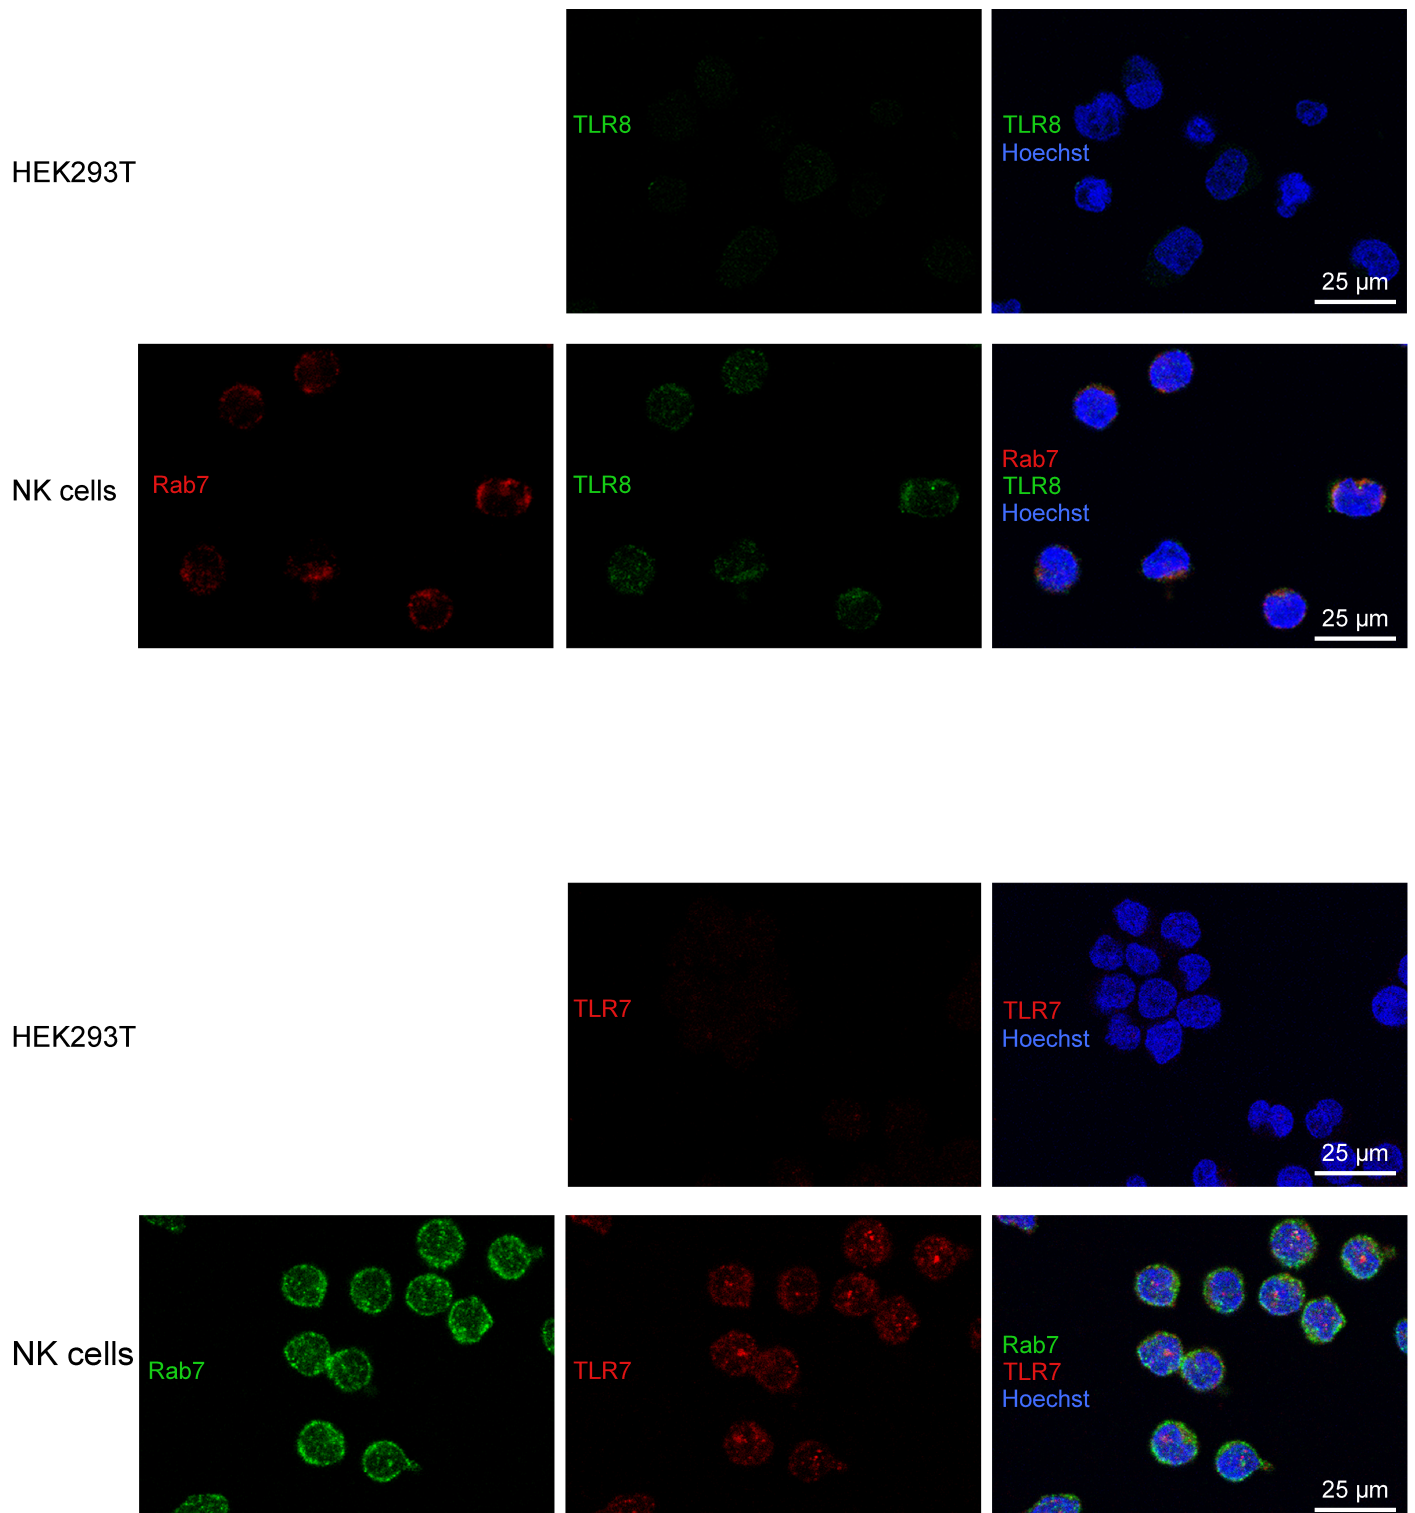**Suppl Fig. 3. TLR7 and TLR8 expression on NK cells endosomes.**

Upper panels: confocal images of TLR8 (green), Rab7 (red) and nuclear dye Hoechst (blue) merged channels. Lower panels: confocal images of TLR7 (red), Rab7 (green) and nuclear dye Hoechst (blue) merged channels. HEK293T cells were used as a negative control for the specificity of the staining. Original magnification: 60x. Bar: 25 μm for HEK293T staining and 10 μm for NK cells staining.
