# Supplementary material for: Toll-like receptor 8 agonists improve NK-cell function primarily targeting CD56brightCD16− subset
Source: PubMed Central journal article supplement — J Immunother Cancer. 2022 Jan 26;10(1):e003385. doi: 10.1136/jitc-2021-003385 (PMC8804697; doi:10.1136/jitc-2021-003385), 2022-01-26
Supplement: jitc-2021-003385supp004.pdf [file jitc-2021-003385supp004.pdf]

## Supplementary Fig. 4

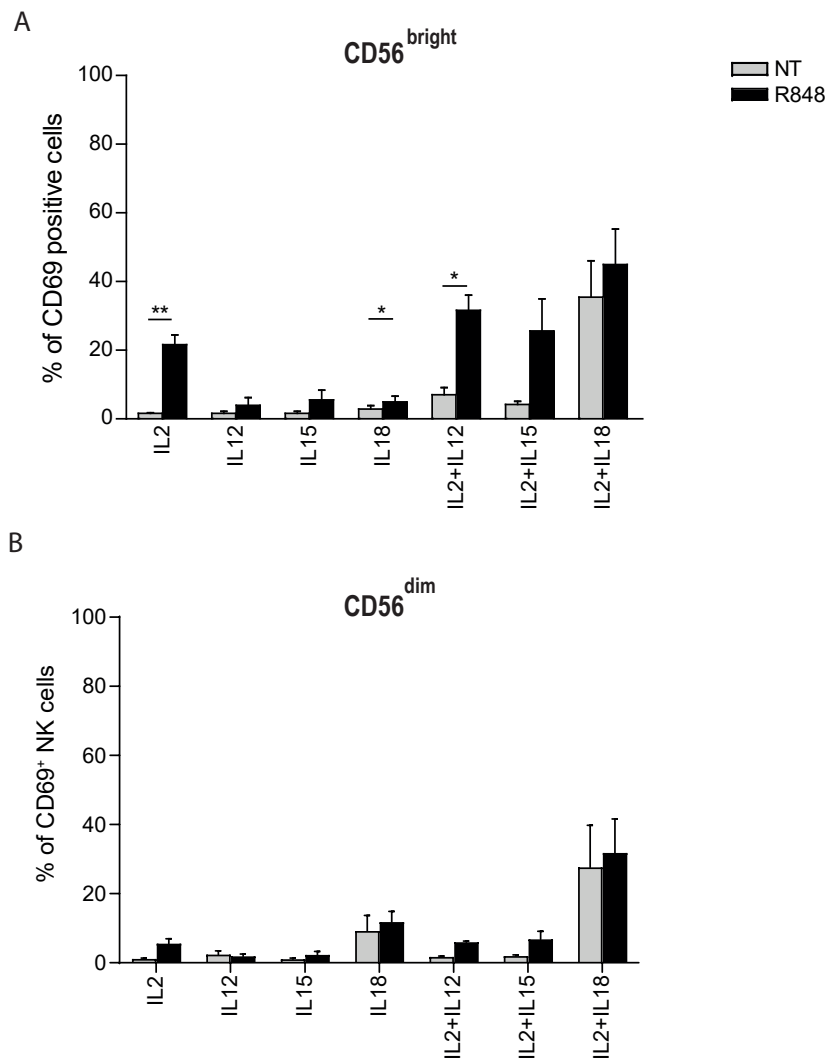

**Suppl. Fig. 4. CD69 expression on NK cells under cytokines stimulation.**

Freshly isolated CD56<sup>bright</sup> (A) and CD56<sup>dim</sup> (B) NK cells were cultured with suboptimal doses of single cytokines or their combination.

CD69 expression was assayed by flow cytometry and represented as percentage of CD69 positive cells (n=4)
