# Supplementary material for: Toll-like receptor 8 agonists improve NK-cell function primarily targeting CD56brightCD16− subset
Source: PubMed Central journal article supplement — J Immunother Cancer. 2022 Jan 26;10(1):e003385. doi: 10.1136/jitc-2021-003385 (PMC8804697; doi:10.1136/jitc-2021-003385), 2022-01-26
Supplement: jitc-2021-003385supp006.pdf [file jitc-2021-003385supp006.pdf]

Supplementary Fig. 6

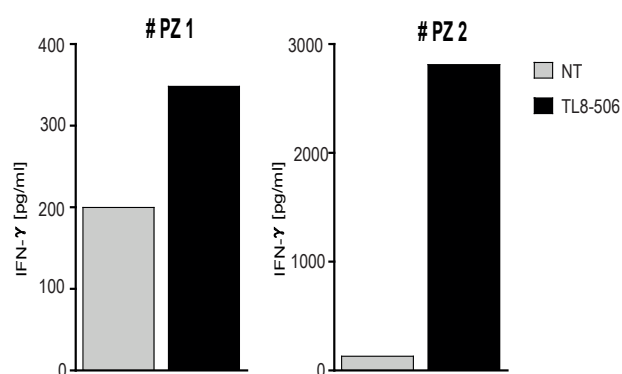**Suppl Fig. 6. IFN- $\gamma$  release by ovarian cancer mononuclear cells.**

Analysis of IFN- $\gamma$  protein level in the supernatant of mononuclear cells derived from ovarian cancer ascites treated for 20h with TL8 (with suboptimal doses of IL-2+IL-12) or untreated (NT). Two representative patients are reported
