# Supplementary material for: Toll-like receptor 8 agonists improve NK-cell function primarily targeting CD56brightCD16− subset
Source: PubMed Central journal article supplement — J Immunother Cancer. 2022 Jan 26;10(1):e003385. doi: 10.1136/jitc-2021-003385 (PMC8804697; doi:10.1136/jitc-2021-003385), 2022-01-26
Supplement: jitc-2021-003385supp007.pdf [file jitc-2021-003385supp007.pdf]

Supplementary Fig. 7

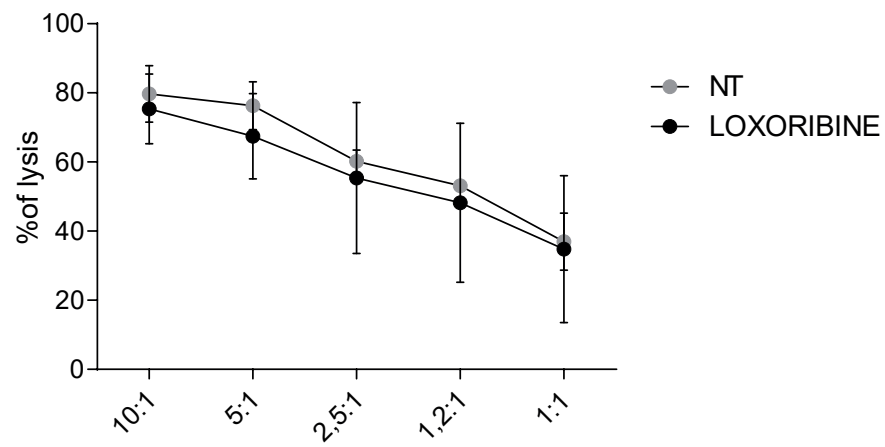**Suppl Fig. 7. Effect of Loxoribine on NK cells.**

Cytotoxicity assay against DAUDI cells performed on NK cells treated for 20h with Loxoribine (1 $\mu$ M), in combination with IL2+IL-12, at different effector:target ratios.
