# Supplementary figures and images for: Toll-like receptor 8 agonists improve NK-cell function primarily targeting CD56brightCD16− subset
Source: PubMed Central journal article supplement — J Immunother Cancer. 2022 Jan 26;10(1):e003385. doi: 10.1136/jitc-2021-003385 (PMC8804697; doi:10.1136/jitc-2021-003385), 2022-01-26

Supplementary Figure 1

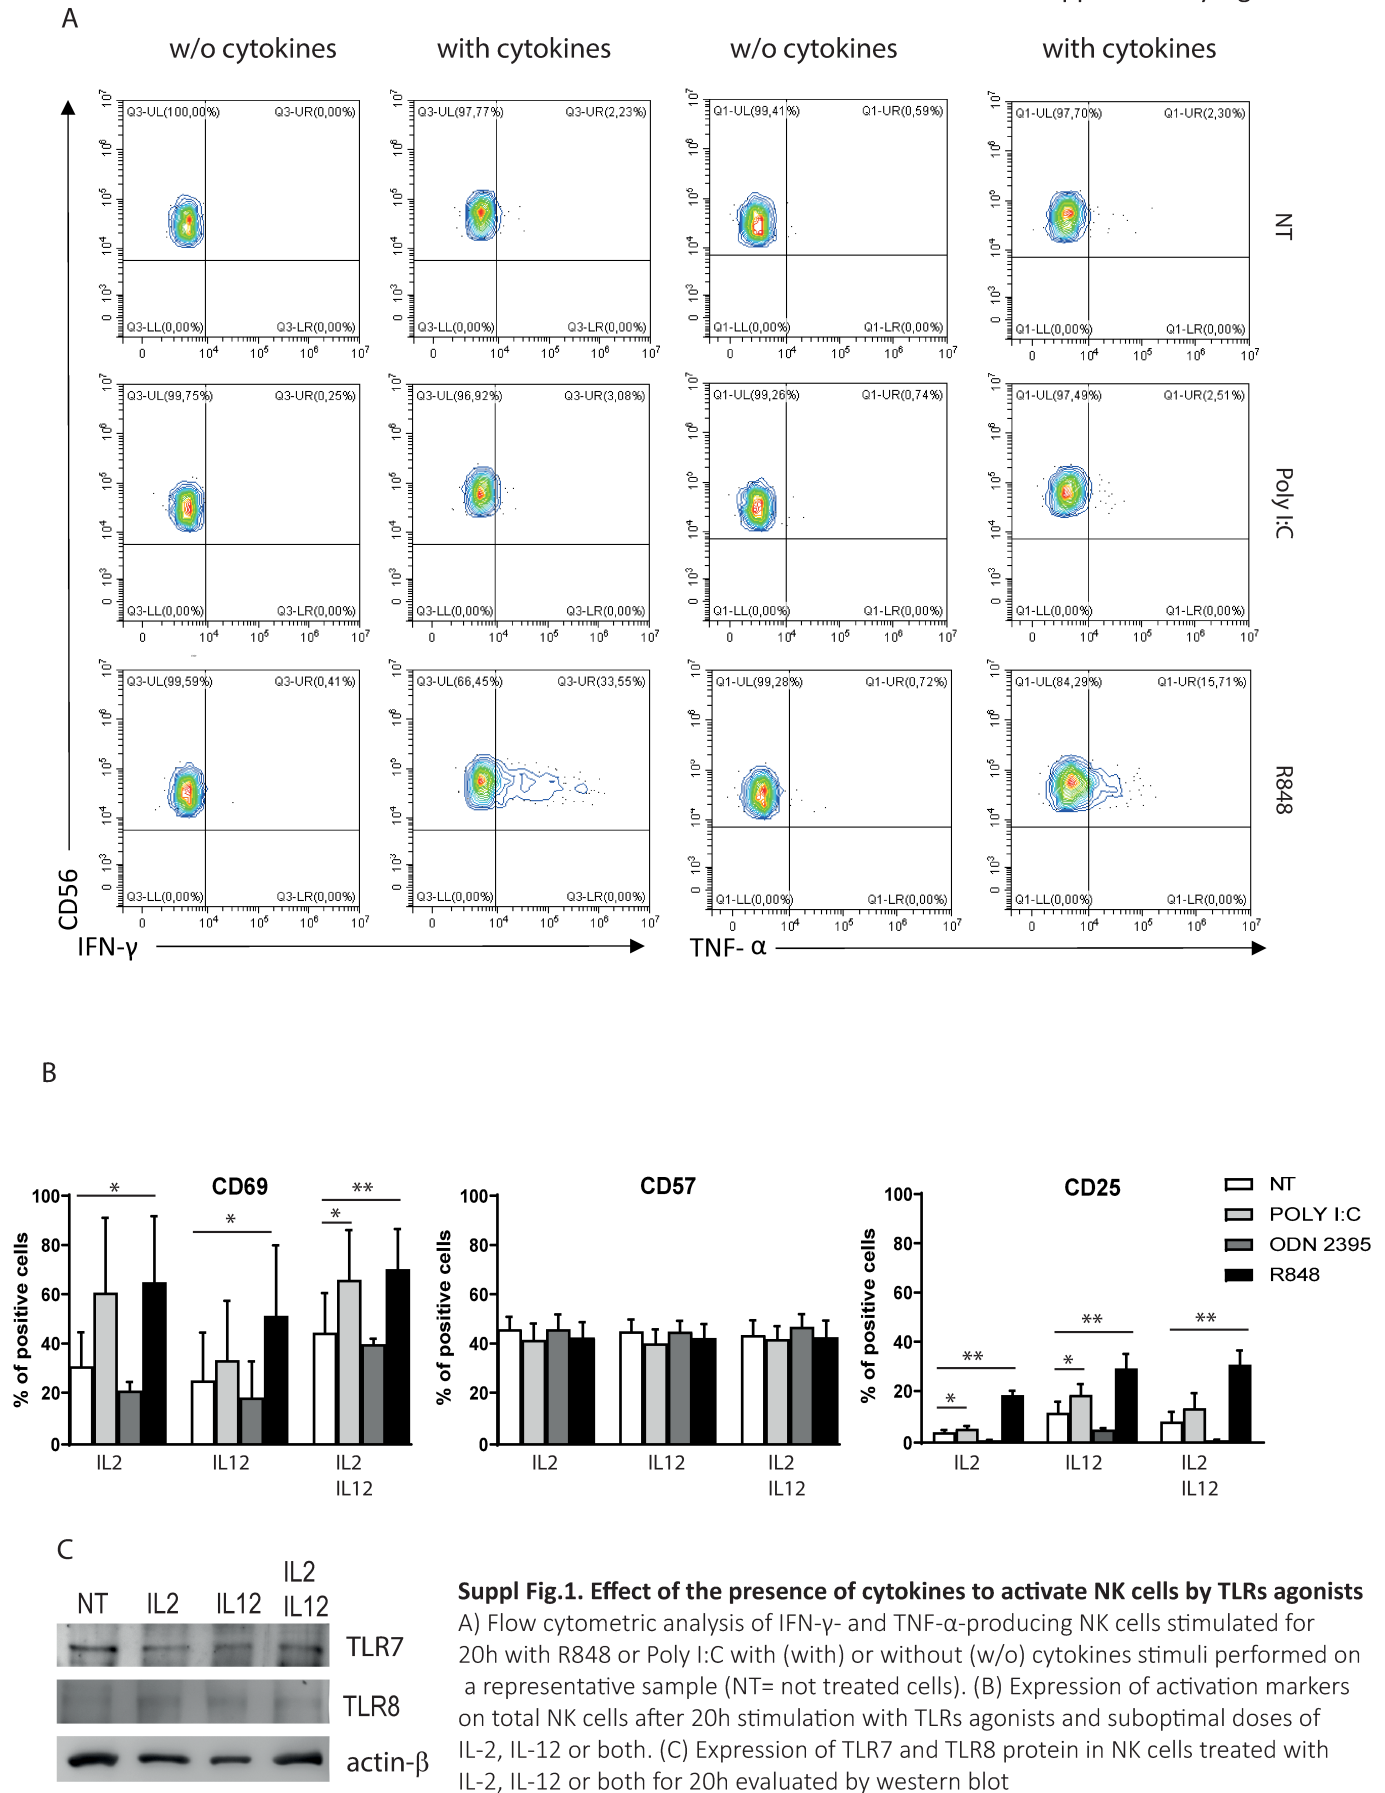

Supplement: jitc-2021-003385supp001.pdf [file jitc-2021-003385supp001.pdf]

## Supplementary Figure 5

A

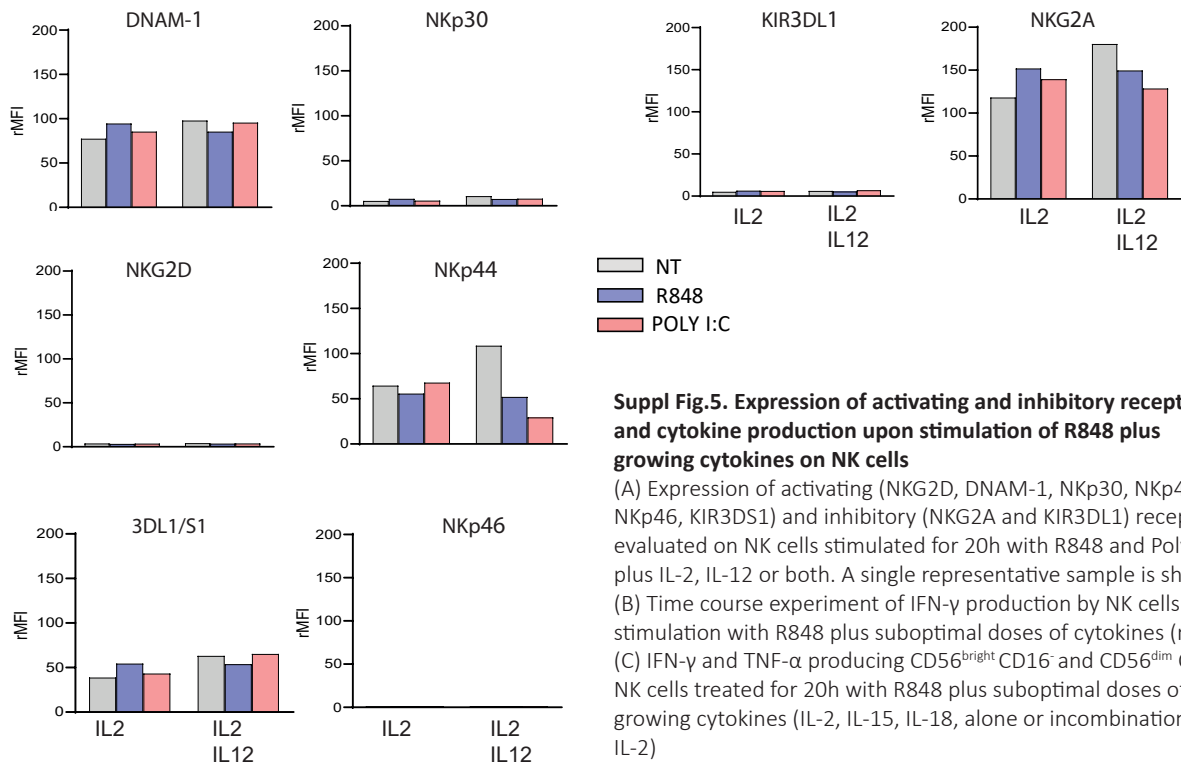

B

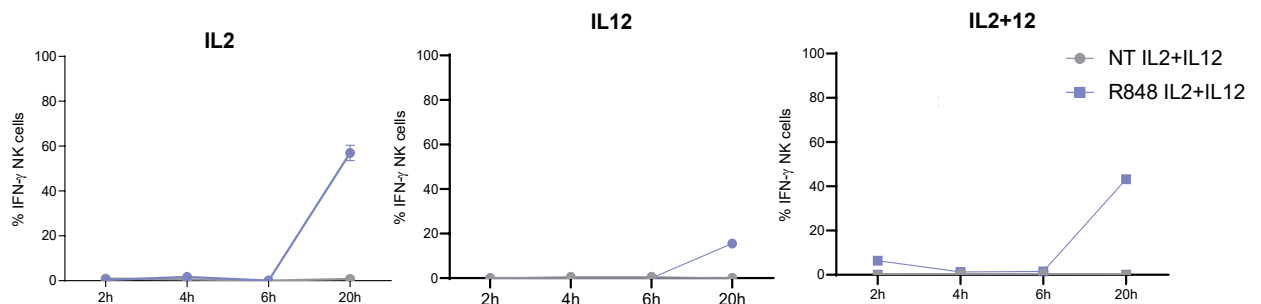

C

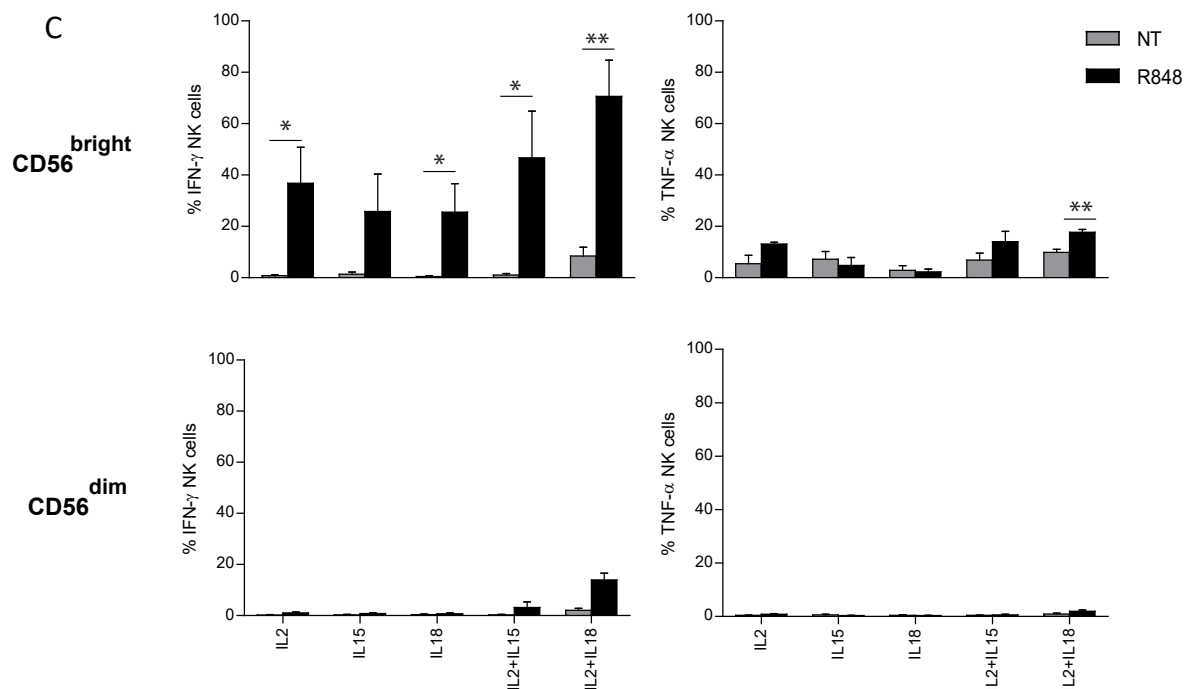

Supplement: jitc-2021-003385supp005.pdf [file jitc-2021-003385supp005.pdf]
